# Supplementary figures and images for: Unveiling COL4A1 as a Key Driver Gene in scleroderma: Insights from Single-Cell and Bulk RNA Sequencing
Source: Research Square preprint supplement (doi:10.21203/rs.3.rs-7376155/v1), 2025-10-10

COL4A1:

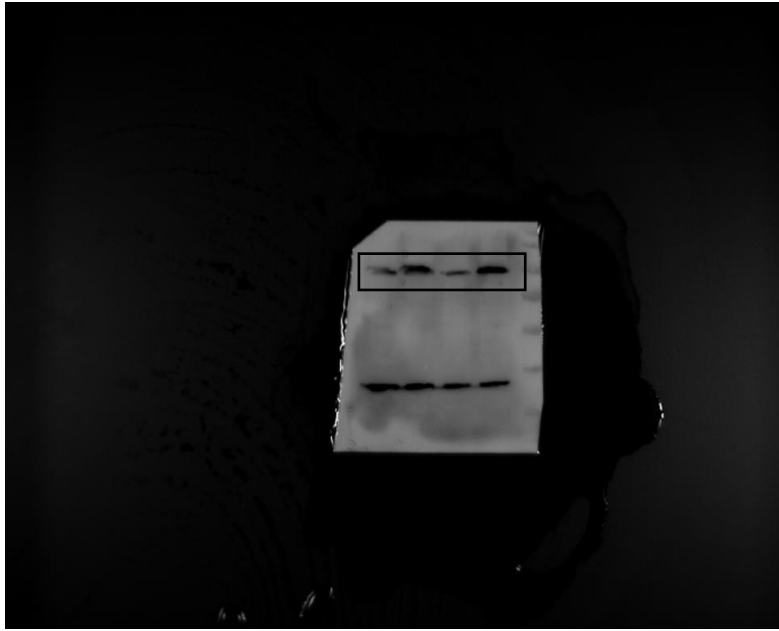

GAPDH:

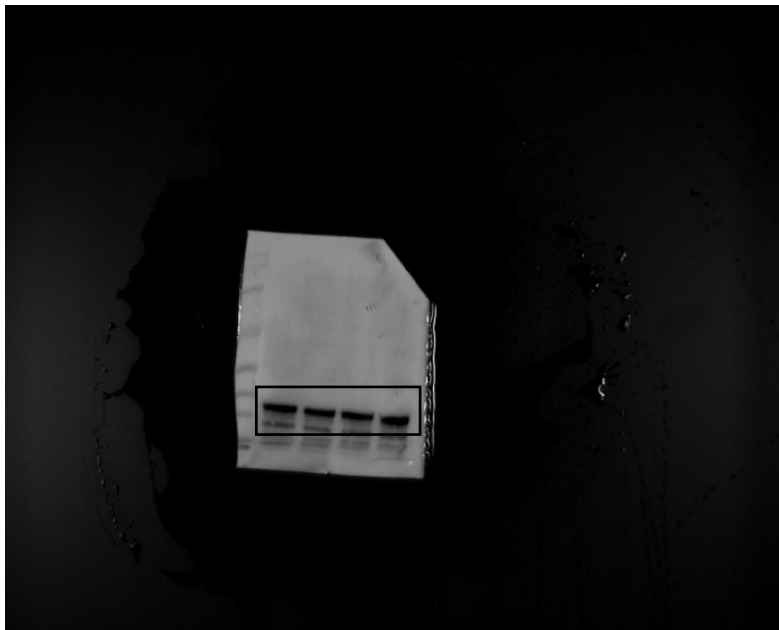

Supplement: Supplementary file 1 [file 04fd977464e181c10296f4c2.pdf]
